# Supplementary material
Source: MDPI journal article supplement (https://www.mdpi.com/2076-3417/9/14/2798)
Supplement: s1 [file s1]

## Supplementary Material

# Combination of Chemo- and Biocatalysis: Conversion of Biomethane to Methanol and Formic Acid

Benny Kunkel <sup>1</sup>, Dominik Seeburg <sup>1</sup>, Tim Peppel <sup>1</sup>, Matthias Stier <sup>2</sup>, Sebastian Wohlrab <sup>1,\*</sup>

### *Characterization of the Chemocatalyst*

#### 1. Methods

Powder X-ray diffraction (XRD) patterns of SBA-15 and V/SBA-15 were measured in a small angle range from 0.5–10° 2 $\theta$ -scale and a wide angle range from 5–80° 2 $\theta$ -scale on a Theta/Theta diffractometer X'Pert Pro from Panalytical, Almelo, Netherlands using Ni-filtered Cu-K $\alpha$  radiation ( $\lambda$  = 1.5418 Å, 40 kV, 40 mA). The data were recorded with the X'Celerator (RTMS) detector.

Specific surface area (after BET-Method) and pore size distribution (after BJH Method) were determined by N<sub>2</sub> sorption at -196 °C applying the NOVA 4200e characterization unit (Quantachrome, Boynton Beach, FL, US). Before measurement, the calcined samples were evacuated (0.13 Pa) *in situ* at 200 °C for 2 h for the removal of physisorbed water.

The vanadium contents were determined using a Varian 715-OES-ICP emission spectrometer. Before the measurement, the samples were digested with a mixture of hydrofluoric acid and aqua regia and then treated in a microwave at 200 °C and 80 bar. The residue was used to determine the Si content by means Atom Absorption Spectroscopy (Analyst 300 Perkin Elmer).

The IR-Spectra were recorded with Diffuse Reflection Infrared Fourier Transform Spectroscopy measurements on a Nicolet 6700 spectrometer (Thermo Scientific) equipped with a commercial reaction cell (Harrick) using CaF<sub>2</sub> windows with connection to a gas-dosing system. The reaction cell was modified as described by Bellmann *et al.* (Appl. Catal. B: Environmental 230 (2018) 184–193.) using a quartz window in the dome to implement a high-temperature reflection probe (Avantes) of a Ava Spec-2048 spectrometer (Avantes). The reflection probe is in contact with the sample without disturbing the optical path of the infrared beam. SBA-15 and V/SBA-15 were heated in a flow of dry synthetic air (32 mL·min<sup>-1</sup>) to 600 °C and treated at this temperature for 2 h. Afterwards the sample was cooled to 25 °C in dry synthetic air flow (32 mL·min<sup>-1</sup>). At the latter conditions IR and UV-Vis spectra were recorded.

Raman spectra were measured on a Lab RAM HR (Horiba Jobin Yvon) Raman microscope using a laser excitation wavelength of 532 nm (objective 50x).

---

### 1.1. X-ray Diffraction

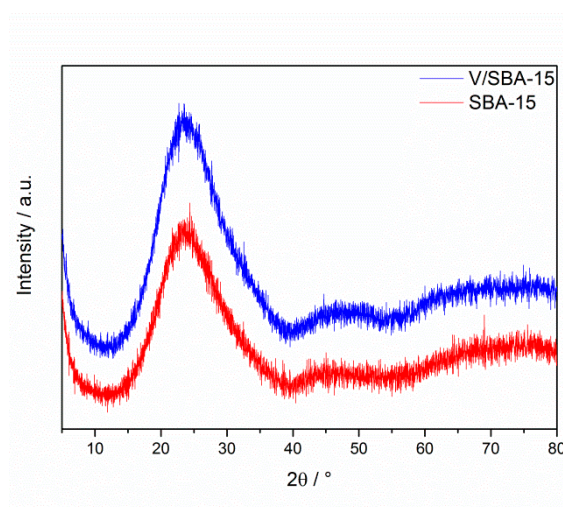

**Figure S1** X-ray diffraction patterns of V/SBA-15 and SBA-15.

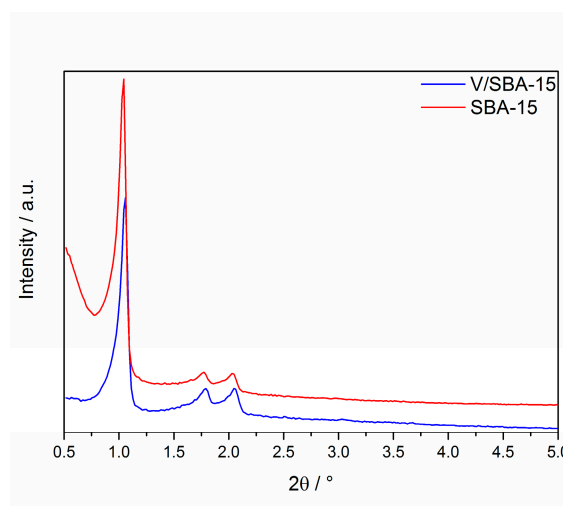

**Figure S2** Small angle X-ray diffraction patterns of V/SBA-15 and SBA-15

### 1.2. Nitrogen Adsorption

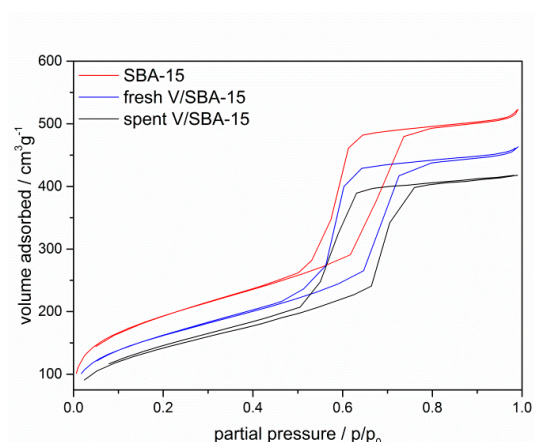

**Figure S3** BET isotherms of SBA-15, V/SBA-15 and spent V/SBA-15.

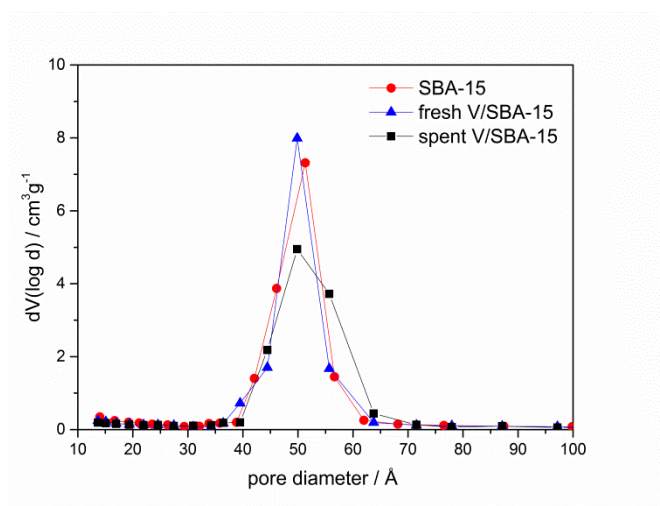

**Figure S4** Pore size distributions of SBA-15, V/SBA-15 and spent V/SBA-15

### 1.3. Spectroscopic Methods

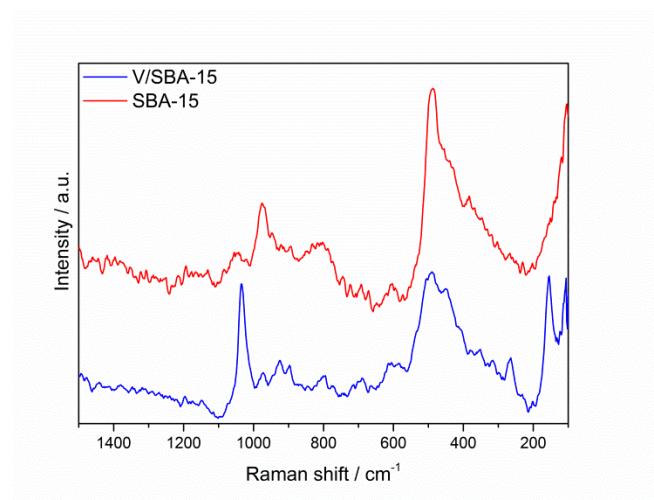

**Figure S5** Raman spectra of V/SBA-15 and SBA-15 under ambient conditions. Excitation at 532 nm.

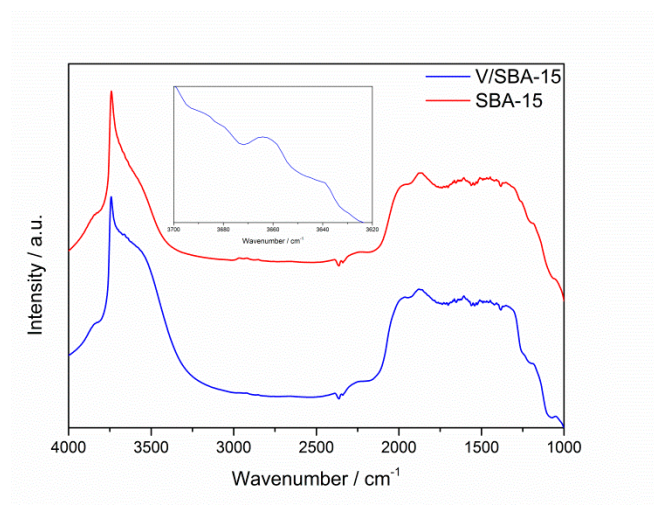

**Figure S6** DRIFTS spectra of V/SBA-15 and SBA-15 at room temperature after drying at 600 °C for 2 h.

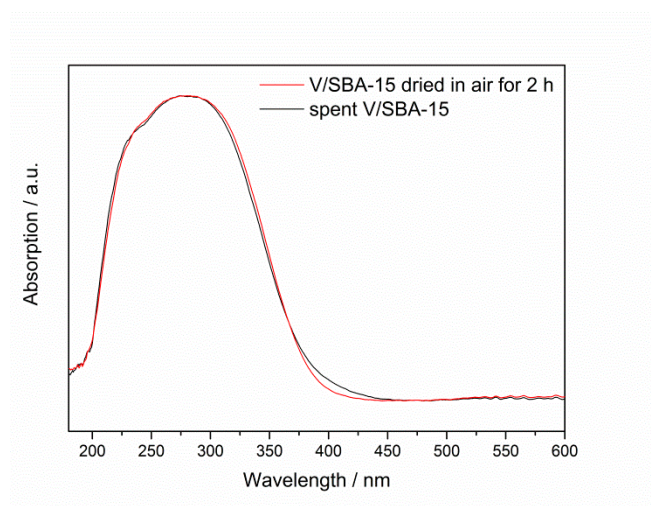

**Figure S7** UV-vis DRS spectra of V/SBA-15 after 2 h at 600 °C in air (V/SBA-15) and spent after application in the chemocatalytic part of the cascade process.

### *Biocatalysis*

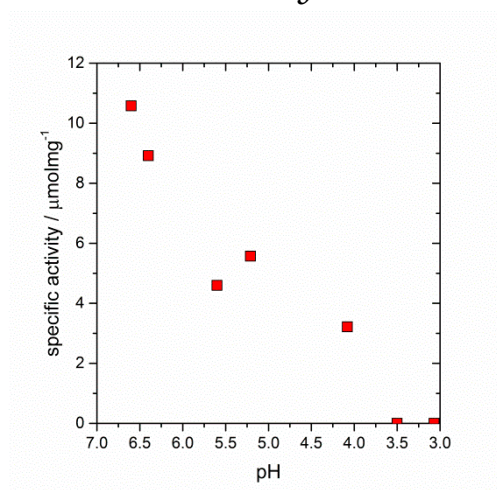

**Figure S8** Specific FDM activity at different pH values.

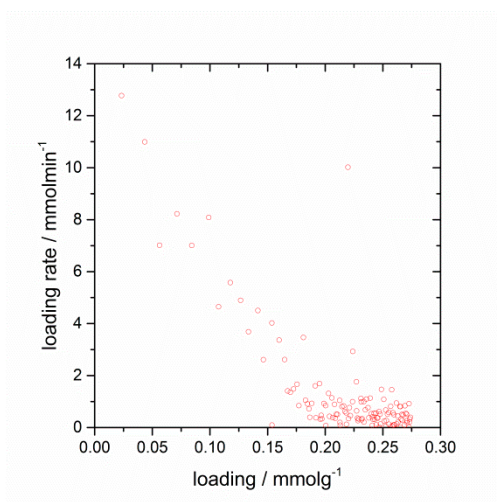

**Figure S9** Loading rate at different loadings of ion exchanger Purolite A111.
